# Supplementary material for: Tamoxifen Activates Transcription Factor EB and Triggers Protective Autophagy in Breast Cancer Cells by Inducing Lysosomal Calcium Release: A Gateway to the Onset of Endocrine Resistance
Source: MDPI journal article supplement (doi:10.3390/ijms25010458), 2023-12-29
Supplement: s1 [file s1]

# **Supplementary Materials**

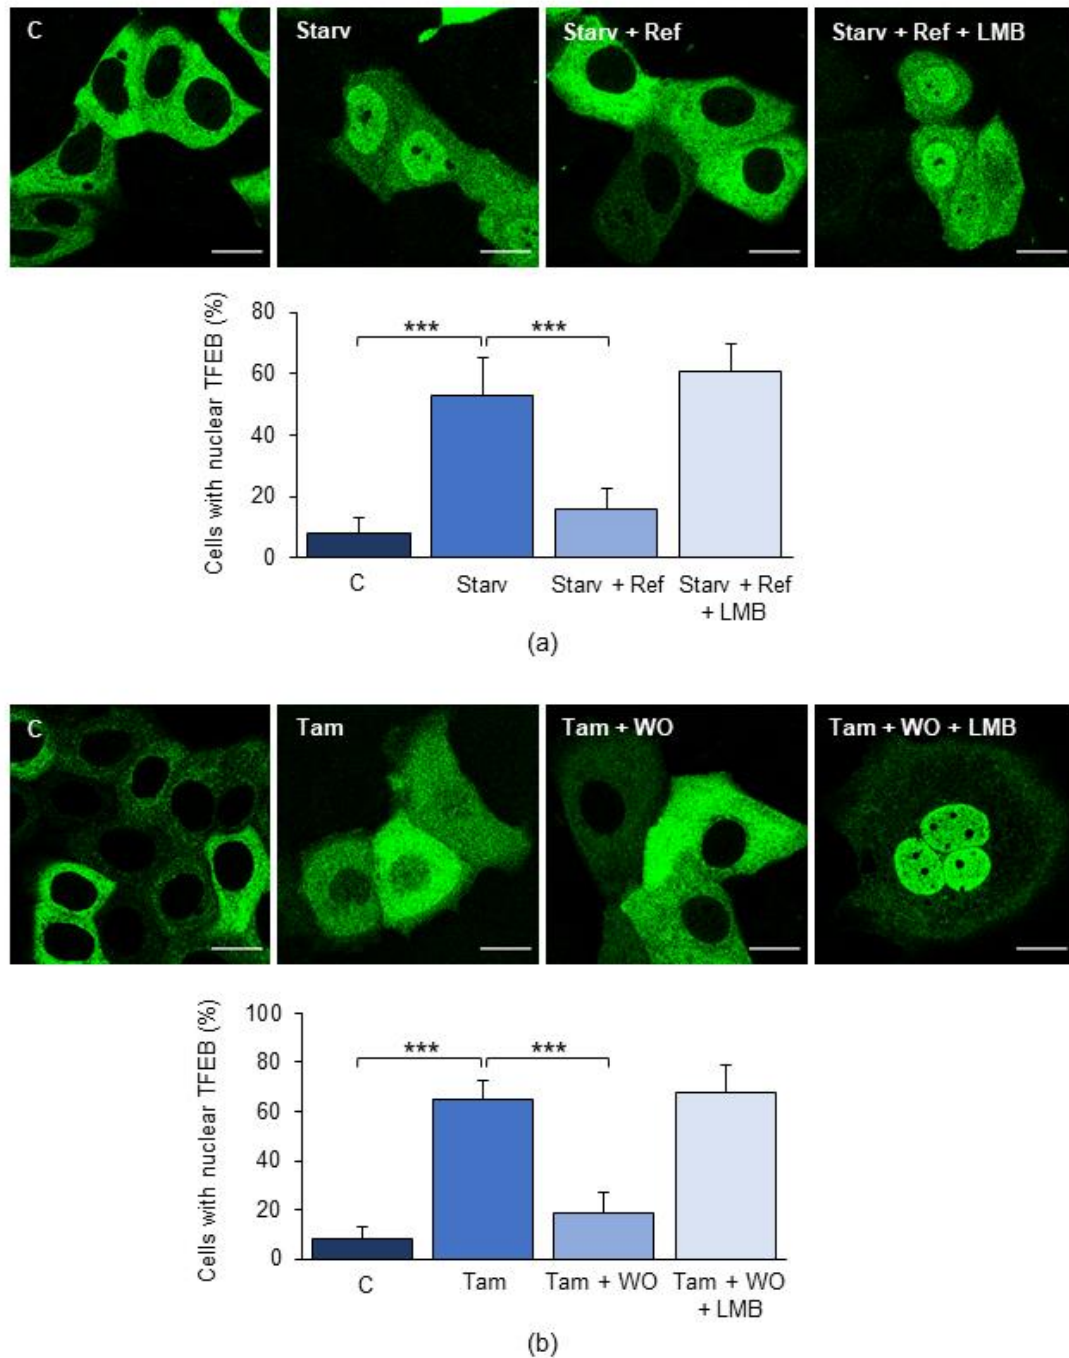

**Figure S1.** Effect of starvation or Tam on the subcellular localization of TFEB-GFP in MCF7 cells. **(a)** Cells starved for 4 h in HBSS-glucose and subsequently refed for 2 h with complete growth medium in the absence or presence of 10 ng/ml of leptomycin B. **(b)** Cells treated for 24 h with 5  $\mu$ M Tam and after Tam removal (washout) either in the absence or presence of 10 ng/ml of leptomycin B. The bar charts below each set of images represent the percentage of cells with nuclear TFEB. C: controls; Starv: starvation; Ref: refeeding; LMB: 10 ng/ml leptomycin B; Tam: 5  $\mu$ M tamoxifen; WO: washout. Data represent the mean  $\pm$  SD of three independent experiments. Statistical significance was assessed by ANOVA followed by the Dunnett's *post-hoc* test; \*\*\*:  $p < 0.001$ . Scale bar: 20  $\mu$ m

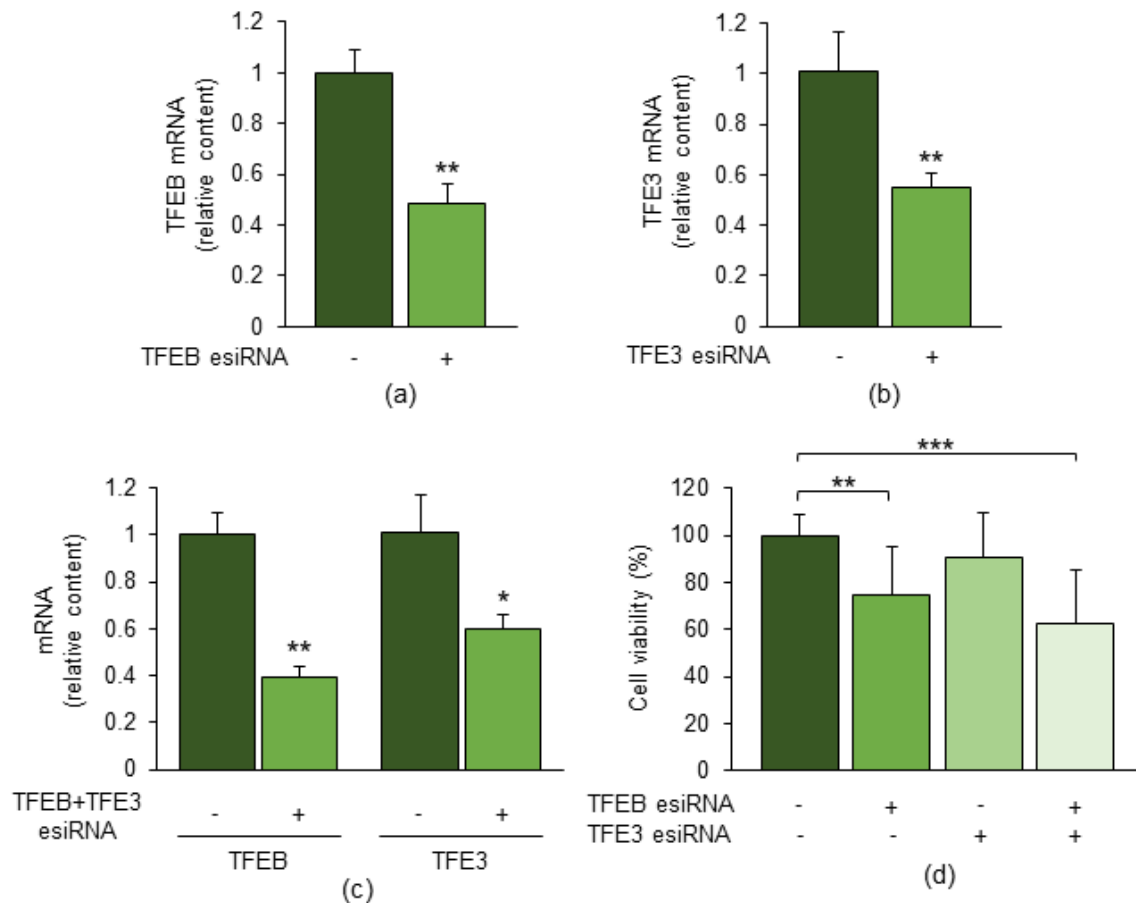

**Figure S2.** Effect of silencing TFEB, TFE3 or both on the viability of MCF7-TamR cells. Content of TFEB (a) or TFE3 (b) mRNA after 72 h of treatment of the cells with the indicated esiRNAs. (c) Effect of simultaneous silencing with siRNAs specific for TFEB and TFE3 on the mRNA amount of each target. (d) Effect of TFEB and/or TFE3 silencing on the viability of MCF7-TamR cells treated with 5  $\mu$ M Tam for 72 h. Data represent the mean  $\pm$  SD of three independent experiments. Statistical significance was assessed with the Student's *t*-test (panels a-c) or by ANOVA followed by the Dunnett's *post-hoc* test (d); \*\*:  $p < 0.01$ ; \*\*\*:  $p < 0.001$

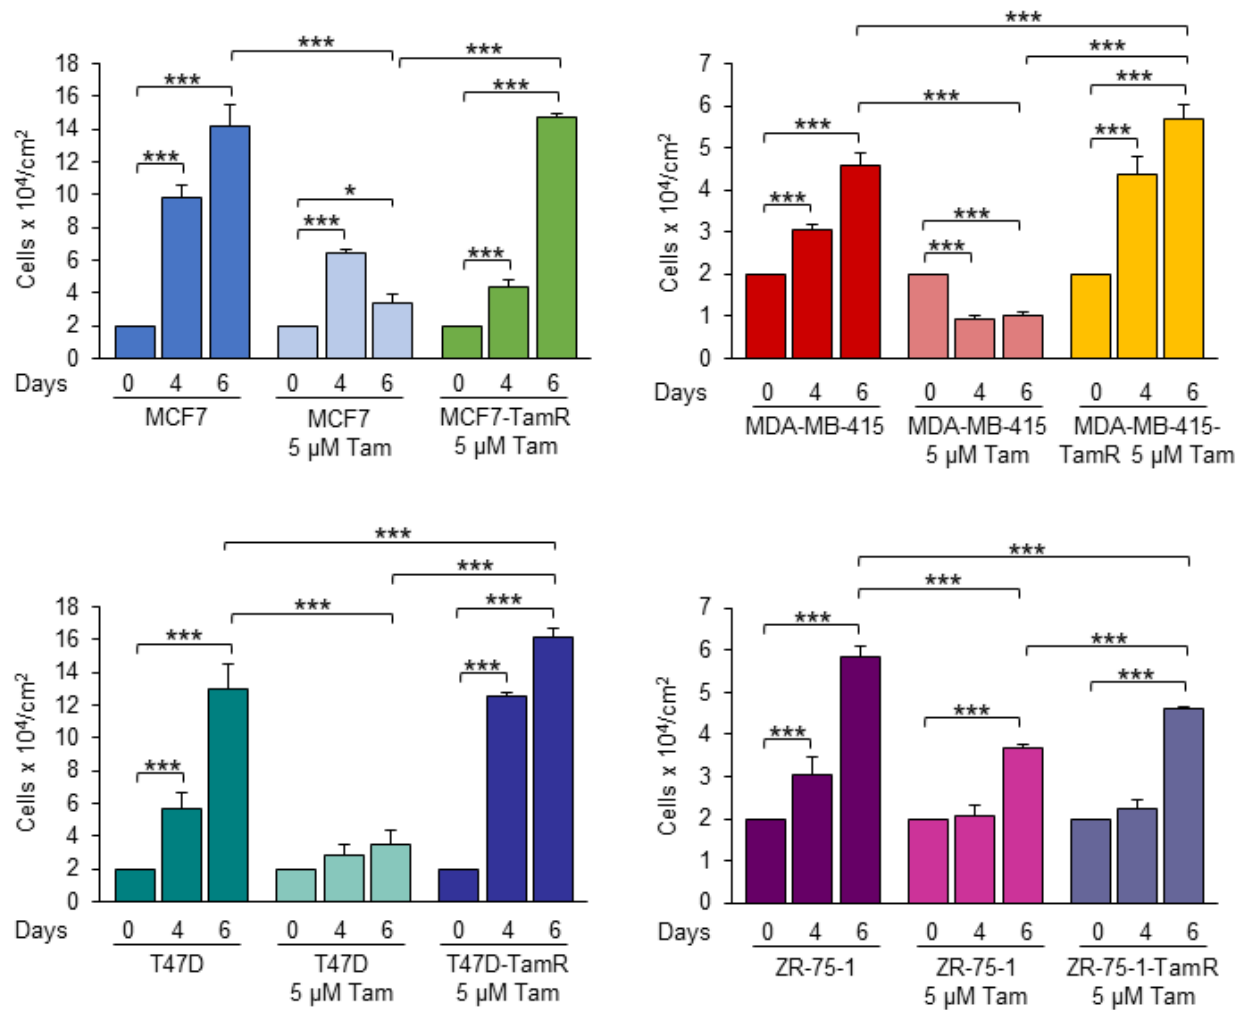

**Figure S3.** Growth of luminal A parental and of their corresponding Tam-resistant breast cancer cell lines. Growth of parental MCF7, MDA-MB-415, T47D, and ZR-75-1 and of their Tam-resistant counterpart generated for the present investigation. The growth of parental cells was assessed both in the absence or in the presence of 5 μM Tam; every Tam-resistant subline was grown exclusively in the presence of 5 μM Tam. Data represent the mean ± SD of three independent experiments. Statistical significance was assessed by ANOVA followed by the Tukey *post-hoc* test; \*:  $p < 0.05$ ; \*\*\*:  $p < 0.001$ .
